# Supplementary material for: THE COSTS AND BENEFITS OF BASAL INFECTION RESISTANCE VS DIVERSE IMMUNE PRIMING RESPONSES IN AN INSECT
Source: bioRxiv or medRxiv preprint supplement (doi:10.1101/734038), 2021-05-25
Supplement: Supplementary file [file media-1.pdf]

## SUPPLEMENTARY METHODS

### Priming and infection protocol

We used a strain of *Bacillus thuringiensis* (DSM 2046) (Bt) originally isolated from a Mediterranean flour moth (Roth *et al.* 2009) as a model pathogen to prime and infect adult *T. castaneum* beetles as outlined in Khan *et al.* (2017a). We used heat-killed bacteria to prime the immune system by activating the immune response without any direct cost of infection. Briefly, we first primed beetles by pricking them with a 0.1mm insect pin (Fine Science Tools, CA) dipped in heat-killed bacterial suspension prepared from freshly grown overnight Bt culture at 30°C (optical density of 0.95), or insect Ringer solution (mock priming) between their head and thorax. After six days, we infected individuals with live bacterial culture adjusted to  $\sim 10^{10}$  cells in 75  $\mu$ l insect Ringer solution (delivers approximately 12000 live cells per beetle; see Khan *et al.* 2017a) or pricked with sterile Ringer solution (mock challenge). We used the same priming and infection protocol for all subsequent assays, unless stated otherwise.

### SUPPLEMENTARY FIGURES

**Figure S1.** Survival curves for within-generation priming and resistance in males ( $n=12$  males/treatment/selection regime/replicate population) after 14 generations of selection. Asterisks and the numbers in parentheses for I beetles denote the hazard ratios calculated from survival curves for priming that are significantly greater than 1 ( $p<0.05$ ; a greater hazard ratio indicates higher benefit of priming)

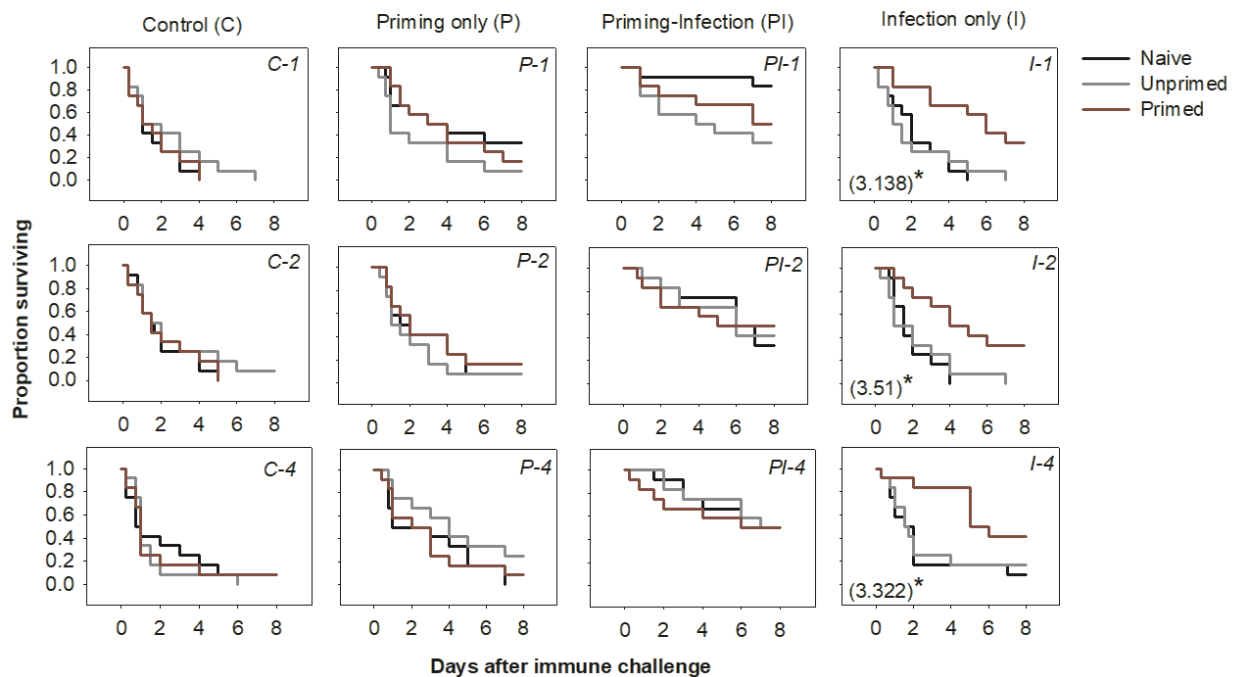

**Figure S2.** Adult survival during the first 48 h after infection with live Bt cells, during the course of experimental evolution between generation 12 and 14.

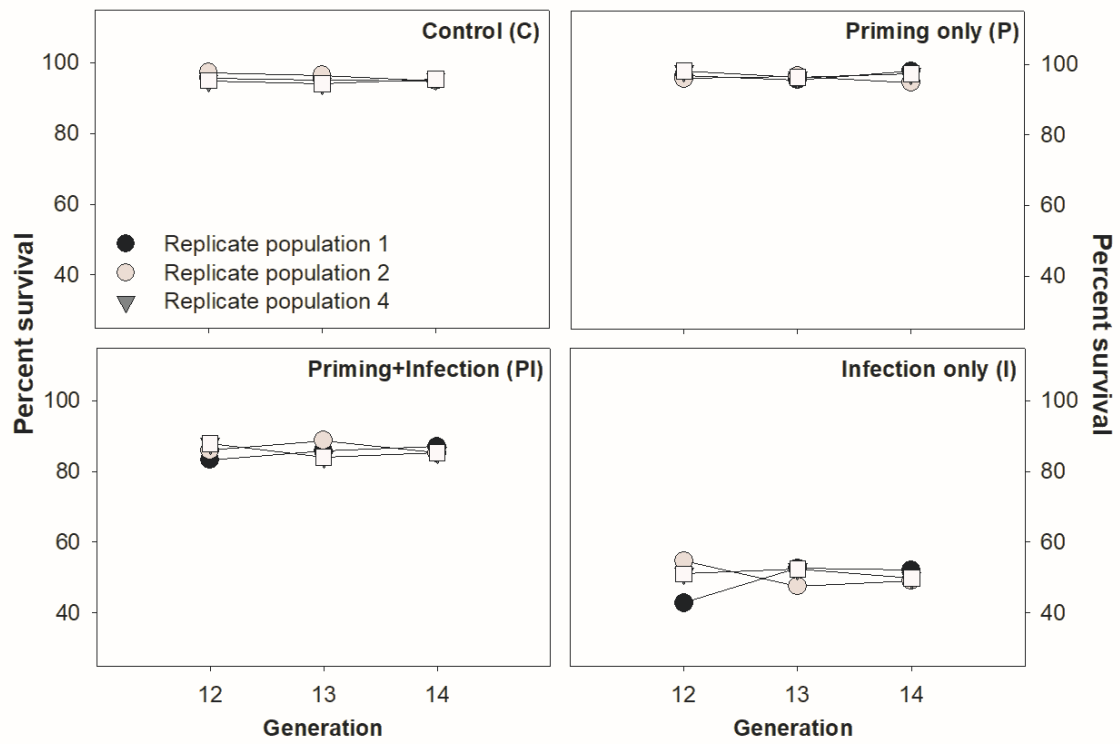

**Figure S3.** Survival curves of naïve males and females under starvation, across selection regimes. P values for the impact of selection regime are reported in each panel.

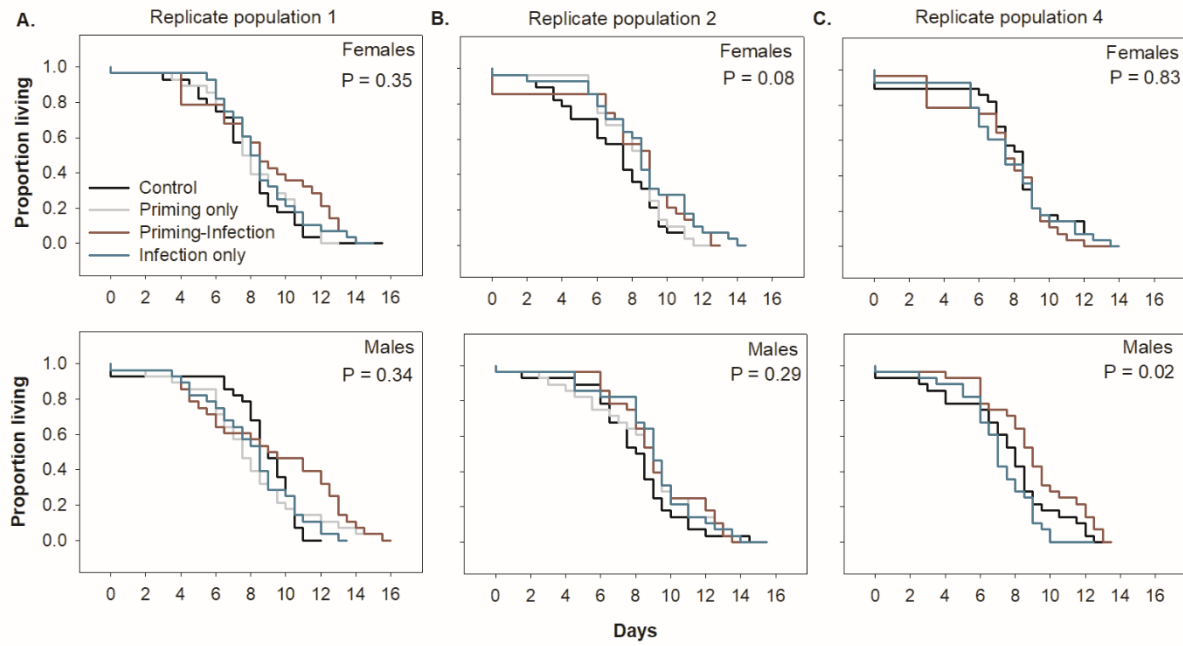

**Figure S4.** Survival curves of naïve females under normal condition up to 95 days post-emergence, across selection regimes. P values for the impact of selection regime are reported in each panel.

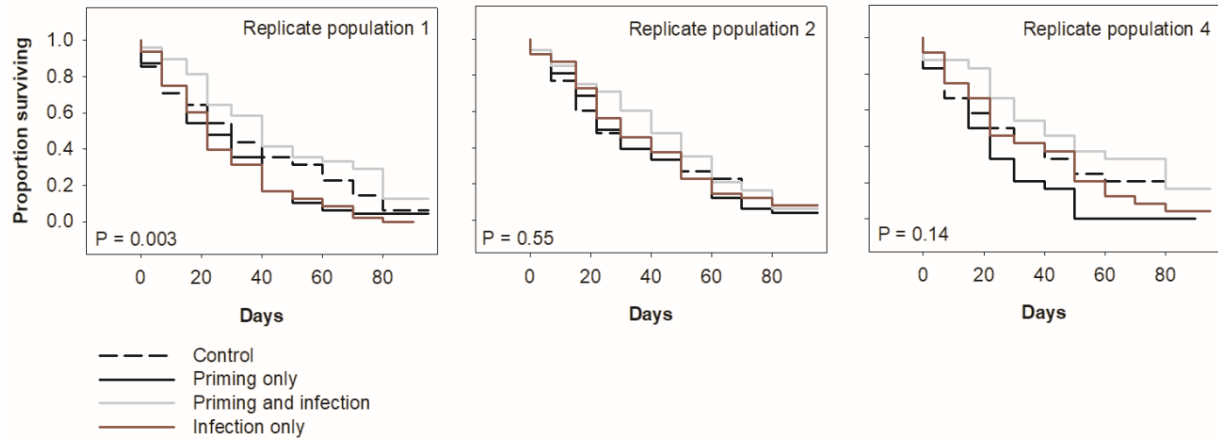

**Figure S5. (A)** Survival curves of the trans-generationally primed I offspring, based on the mean survival calculated from each parental pair. P values for the impact of TGIP are reported in each panel. **(B)** Survival benefits of WGIP vs. TGIP, based on the hazard function calculated from survival curves shown in panel A (offspring from unprimed parents vs. primed parents) and Fig 2 & S1 (males and females from unprimed vs. primed groups). A greater hazard ratio indicates higher benefit of priming. P values for the impact of priming type ( $P_{\text{Priming}}$ ) and sex ( $P_{\text{Sex}}$ ) are reported in each panel.

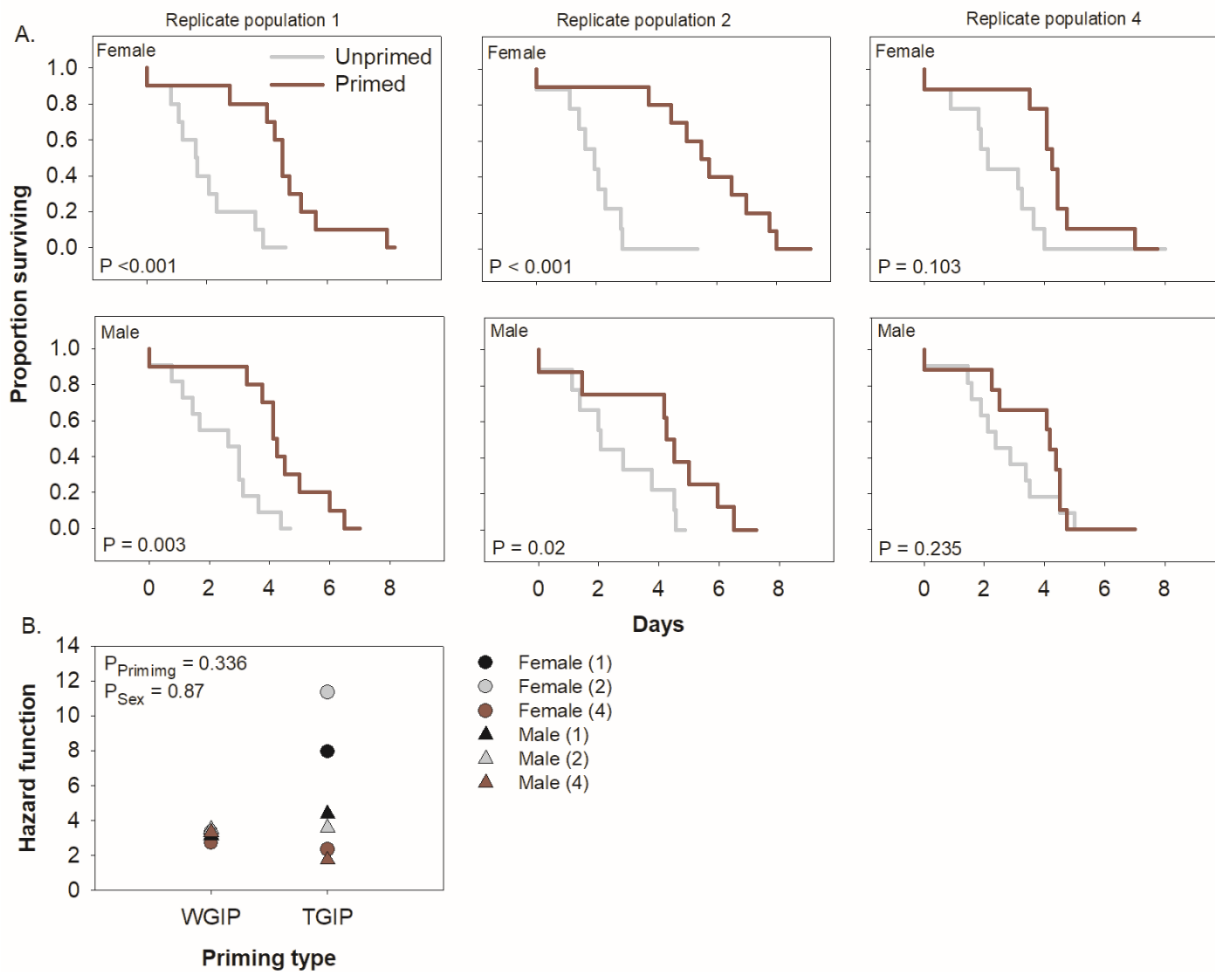

## SUPPLEMENTARY TABLES

**Table S1.** A. Number of females that were alive to reproduce after within-generation priming and infection across replicate populations, selection regimes and treatments. B. Summary of Wilcoxon Rank Sum Test on post-infection replicate size across priming treatments and selection regimes.

| A. | Replicate population | Selection regime  | Naïve | Unprimed | Primed |
|----|----------------------|-------------------|-------|----------|--------|
| 1  |                      | Control           | 5     | 7        | 4      |
|    |                      | Priming only      | 8     | 9        | 10     |
|    |                      | Priming-Infection | 7     | 11       | 12     |
|    |                      | Infection only    | 6     | 5        | 11     |
| 2  |                      | Control           | 7     | 10       | 10     |
|    |                      | Priming only      | 6     | 8        | 10     |
|    |                      | Priming-Infection | 8     | 10       | 8      |
|    |                      | Infection only    | 10    | 8        | 10     |
| 4  |                      | Control           | 6     | 8        | 9      |
|    |                      | Priming only      | 6     | 9        | 7      |
|    |                      | Priming-Infection | 11    | 10       | 10     |
|    |                      | Infection only    | 7     | 8        | 10     |
| B. | Trait                | $\chi^2$          | df    | P        |        |
|    | Treatment            | 1.545             | 1     | 0.213    |        |
|    | Regime               | 5.452             | 3     | 0.141    |        |

**Table S2.** Summary of Cox proportional hazard analysis on survival data for within-generation priming in females.

| Regime              | Replicate population | df | $\chi^2$ | P            |
|---------------------|----------------------|----|----------|--------------|
| Control             | 1                    | 1  | 0.414    | 0.519        |
| Infection only      |                      | 1  | 6.502    | <b>0.01</b>  |
| Priming only        |                      | 1  | 0.247    | 0.618        |
| Priming & Infection |                      | 1  | 0.064    | 0.799        |
| Control             | 2                    | 1  | 0.297    | 0.585        |
| Infection only      |                      | 1  | 6.493    | <b>0.01</b>  |
| Priming only        |                      | 1  | 1.961    | 0.161        |
| Priming & Infection |                      | 1  | 0.005    | 0.942        |
| Control             | 4                    | 1  | 0.088    | 0.765        |
| Infection only      |                      | 1  | 4.783    | <b>0.028</b> |
| Priming only        |                      | 1  | 0.721    | 0.395        |
| Priming & Infection |                      | 1  | 0.032    | 0.855        |

**Table S3.** Summary of Cox proportional hazard analysis on survival data for within-generation priming in males.

| Regime              | Replicate population | df | $\chi^2$ | P            |
|---------------------|----------------------|----|----------|--------------|
| Control             | 1                    | 1  | 0.743    | 0.388        |
| Infection only      |                      | 1  | 7.562    | <b>0.005</b> |
| Priming only        |                      | 1  | 1.388    | 0.238        |
| Priming & Infection |                      | 1  | 0.759    | 0.383        |
| Control             | 2                    | 1  | 0.449    | 0.502        |
| Infection only      |                      | 1  | 5.766    | <b>0.016</b> |
| Priming only        |                      | 1  | 0.882    | 0.347        |
| Priming & Infection |                      | 1  | 0.0002   | 0.988        |
| Control             | 4                    | 1  | 0.019    | 0.888        |
| Infection only      |                      | 1  | 4.843    | <b>0.027</b> |
| Priming only        |                      | 1  | 1.531    | 0.215        |
| Priming & Infection |                      | 1  | 0.117    | 0.731        |

**Table S4.** Summary of Cox proportional hazard analysis on survival data of naïve beetles infected with Bt.

|          | Comparison | Replicate population | Hazard function | df   | $\chi^2$ | P                |             |
|----------|------------|----------------------|-----------------|------|----------|------------------|-------------|
| Mothers  | C vs. P    | 1                    | 1.51            | 1    | 0.973    | 0.323            |             |
|          |            | 2                    | 2.34            | 1    | 3.478    | 0.062            |             |
|          |            | 4                    | 1.36            | 1    | 0.519    | 0.471            |             |
|          | C vs. PI   | 1                    | <b>5.87</b>     | 1    | 11.265   | <b>0.001</b>     |             |
|          |            | 2                    | <b>4.3</b>      | 1    | 7.882    | <b>0.005</b>     |             |
|          |            | 4                    | <b>3.03</b>     | 1    | 5.318    | <b>0.021</b>     |             |
|          | C vs. I    | 1                    | 0.95            | 1    | 0.01     | 0.919            |             |
|          |            | 2                    | 1.34            | 1    | 0.504    | 0.473            |             |
|          |            | 4                    | 0.958           | 1    | 0.011    | 0.912            |             |
|          | Fathers    | C vs. P              | 1               | 3.03 | 1        | 5.391            | <b>0.02</b> |
|          |            |                      | 2               | 1.41 | 1        | 0.657            | 0.417       |
|          |            |                      | 4               | 1.28 | 1        | 0.358            | 0.549       |
| C vs. PI |            | 1                    | <b>28.9</b>     | 1    | 20.407   | <b>&lt;0.001</b> |             |
|          |            | 2                    | <b>8.52</b>     | 1    | 13.608   | <b>0.001</b>     |             |
|          |            | 4                    | <b>4.37</b>     | 1    | 8.24     | <b>0.004</b>     |             |
| C vs. I  |            | 1                    | 1.54            | 1    | 1.052    | 0.305            |             |
|          |            | 2                    | 0.91            | 1    | 0.043    | 0.835            |             |
|          |            | 4                    | 1.15            | 1    | 0.107    | 0.743            |             |

**Table S5.** Summary of Wilcoxon Rank Sum test on beetle reproduction before infection as function of within-generation priming and selection regime

| Block | Trait     | $\chi^2$ | df | P      |
|-------|-----------|----------|----|--------|
| 1     | Regime    | 6.046    | 3  | 0.109  |
|       | Treatment | 1.055    | 2  | 0.589  |
| 2     | Regime    | 2.933    | 3  | 0.402  |
|       | Treatment | 1.531    | 2  | 0.464  |
| 4     | Regime    | 7.653    | 3  | 0.0537 |
|       | Treatment | 1.647    | 2  | 0.438  |

**Table S6.** Summary of Wilcoxon Rank Sum test for change in reproductive output with infection across replicate populations and selection regimes. C- Control; P – Priming only; PI- Priming-Infection; I- Infection only.

| Regime | Replicate populations | Treatment | $\chi^2$ | df | P            |
|--------|-----------------------|-----------|----------|----|--------------|
| C      | 1                     | Naive     | 6.043    | 1  | <b>0.013</b> |
|        |                       | Unprimed  | 8.337    | 1  | <b>0.003</b> |
|        |                       | Primed    | 0.134    | 1  | 0.713        |
|        | 2                     | Naive     | 6.685    | 1  | <b>0.009</b> |
|        |                       | Unprimed  | 9.486    | 1  | <b>0.002</b> |
|        |                       | Primed    | 5.353    | 1  | <b>0.02</b>  |
|        | 4                     | Naive     | 4.854    | 1  | <b>0.027</b> |
|        |                       | Unprimed  | 10.54    | 1  | <b>0.001</b> |
|        |                       | Primed    | 4.71     | 1  | <b>0.029</b> |
| P      | 1                     | Naive     | 5.55     | 1  | <b>0.018</b> |
|        |                       | Unprimed  | 6.247    | 1  | <b>0.012</b> |
|        |                       | Primed    | 5.225    | 1  | <b>0.022</b> |
|        | 2                     | Naive     | 5.089    | 1  | <b>0.024</b> |
|        |                       | Unprimed  | 1.258    | 1  | 0.262        |
|        |                       | Primed    | 4.5      | 1  | <b>0.033</b> |
|        | 4                     | Naive     | 0.718    | 1  | 0.396        |
|        |                       | Unprimed  | 7.321    | 1  | <b>0.006</b> |
|        |                       | Primed    | 0.652    | 1  | 0.419        |
| PI     | 1                     | Naive     | 1.121    | 1  | 0.289        |
|        |                       | Unprimed  | 4.84     | 1  | <b>0.028</b> |
|        |                       | Primed    | 0.067    | 1  | 0.794        |
|        | 2                     | Naive     | 0.542    | 1  | 0.461        |
|        |                       | Unprimed  | 0.184    | 1  | 0.667        |
|        |                       | Primed    | 4.73     | 1  | <b>0.029</b> |
|        | 4                     | Naive     | 0.095    | 1  | 0.757        |



|   |   |          |       |   |              |
|---|---|----------|-------|---|--------------|
|   |   | Unprimed | 4.898 | 1 | <b>0.026</b> |
|   |   | Primed   | 1.933 | 1 | 0.164        |
| I | 1 | Naive    | 4.486 | 1 | <b>0.034</b> |
|   |   | Unprimed | 8.475 | 1 | <b>0.003</b> |
|   |   | Primed   | 11.91 | 1 | <b>0.001</b> |
|   | 2 | Naive    | 11.81 | 1 | <b>0.001</b> |
|   |   | Unprimed | 8.408 | 1 | <b>0.003</b> |
|   |   | Primed   | 6.324 | 1 | <b>0.011</b> |
|   | 4 | Naive    | 4.484 | 1 | <b>0.034</b> |
|   |   | Unprimed | 3.163 | 1 | 0.075        |
|   |   | Primed   | 5.66  | 1 | <b>0.017</b> |

**Table S7.** Summary of ANOVA on reproductive output after within-generation priming and bacterial infection across A. all the selection regimes; B. Control (C) vs. Priming only (P); C. Control (C) vs. Priming-Infection (PI); D. Control (C) vs. Infection only (I).

|    |            | Trait                    | SS        | SS  | F-ratio | P                 |
|----|------------|--------------------------|-----------|-----|---------|-------------------|
| A. | All regime | Replicate population (B) | 90.439    | 2   | 1.128   | 0.324             |
|    |            | Regime (R)               | 1399.783  | 3   | 11.647  | <b>3.40872e-7</b> |
|    |            | Treatment (T)            | 317.954   | 2   | 3.968   | <b>0.02</b>       |
|    |            | B × R                    | 207.363   | 6   | 0.8626  | 0.522             |
|    |            | B × T                    | 54.542    | 4   | 0.34    | 0.85              |
|    |            | R × T                    | 639.203   | 6   | 2.6597  | <b>0.016</b>      |
|    |            | B × R × T                | 504.924   | 12  | 1.05    | 0.403             |
|    |            | Error                    | 10616.212 | 265 |         |                   |
| B. | C vs. P    | B                        | 92.547    | 2   | 1.028   | 0.36              |
|    |            | R                        | 291.311   | 1   | 6.476   | <b>0.012</b>      |
|    |            | T                        | 541.137   | 2   | 6.015   | <b>0.003</b>      |
|    |            | B × R                    | 6.848     | 2   | 0.076   | 0.926             |
|    |            | B × T                    | 45.137    | 4   | 0.255   | 0.908             |
|    |            | R × T                    | 276.217   | 2   | 3.07    | <b>0.05</b>       |
|    |            | B × R × T                | 240.453   | 4   | 1.336   | 0.26              |
|    |            | Error                    | 5442.71   | 121 |         |                   |
| C. | C vs. PI   | B                        | 101.513   | 2   | 1.396   | 0.251             |
|    |            | R                        | 563.698   | 1   | 15.507  | <b>0.0001</b>     |
|    |            | T                        | 410.017   | 2   | 5.639   | <b>0.004</b>      |
|    |            | B × R                    | 67.251    | 2   | 0.925   | 0.399             |
|    |            | B × T                    | 144.875   | 4   | 0.996   | 0.411             |
|    |            | R × T                    | 477.395   | 2   | 6.566   | <b>0.001</b>      |
|    |            | B × R × T                | 96.024    | 4   | 0.66    | 0.62              |
|    |            | Error                    | 4907.311  | 135 |         |                   |
| D. | C vs. I    | B                        | 67.991    | 2   | 0.974   | 0.38              |
|    |            | R                        | 61.381    | 1   | 1.76    | 0.187             |
|    |            | T                        | 467.012   | 2   | 6.695   | <b>0.0017</b>     |

|           |          |     |       |              |
|-----------|----------|-----|-------|--------------|
| B × R     | 25.001   | 2   | 0.351 | 0.699        |
| B × T     | 93.715   | 4   | 0.671 | 0.612        |
| R × T     | 311.382  | 2   | 4.464 | <b>0.013</b> |
| B × R × T | 156.131  | 4   | 1.119 | 0.35         |
| Error     | 4289.419 | 123 |       |              |

**Table S8.** Summary of Cox proportional hazard analysis on survival under starvation of unhandled naïve beetles across selection regimes.

| Replicate population | Sex    | df | $\chi^2$ | P     |
|----------------------|--------|----|----------|-------|
| 1                    | Female | 3  | 0.45     | 0.92  |
|                      | Male   | 3  | 5.323    | 0.149 |
| 2                    | Female | 3  | 4.156    | 0.245 |
|                      | Male   | 3  | 1.353    | 0.716 |
| 4                    | Female | 2  | 1.16     | 0.55  |
|                      | Male   | 2  | 4.099    | 0.128 |

**Table S9.** Summary of Cox proportional hazard analysis on long-term survival of unhandled naïve females across selection regimes.

| Replicate population | df | $\chi^2$   | P            |
|----------------------|----|------------|--------------|
| 1                    | 3  | 13.6393732 | <b>0.003</b> |
| 2                    | 3  | 2.06145929 | 0.559        |
| 4                    | 3  | 5.47204481 | 0.14         |

**Table S10.** Summary of (A) two-way ANOVA and (B) one-way ANOVA on early survival and developmental rate.

| A. Assay         | Trait              | df | SS       | F ratio | P                 |
|------------------|--------------------|----|----------|---------|-------------------|
| Egg-hatchability | Regime             | 2  | 1527.375 | 52.206  | <b>3.21391e-8</b> |
|                  | Replicate          | 2  | 1328.446 | 45.406  | <b>9.2751e-8</b>  |
|                  | Regime × Replicate | 4  | 196.92   | 3.3653  | <b>0.031</b>      |
|                  | experiment         |    |          |         |                   |
| Pupae_3 week     | Regime             | 2  | 0.0192   | 3.0433  | 0.072             |
|                  | Replicate          | 2  | 0.035    | 5.587   | <b>0.012</b>      |
|                  | Regime × Replicate | 4  | 0.006    | 0.494   | 0.739             |
|                  | experiment         |    |          |         |                   |
| Adult_4 week     | Regime             | 2  | 0.045    | 4.886   | <b>0.02</b>       |
|                  | Replicate          | 2  | 0.024    | 2.58    | 0.103             |
|                  | Regime × Replicate | 4  | 0.005    | 0.292   | 0.879             |
|                  | experiment         |    |          |         |                   |
| %viability       | Regime             | 2  | 1444.91  | 26.32   | <b>4.52819e-6</b> |

|           |                                  |              |           |                |              |              |
|-----------|----------------------------------|--------------|-----------|----------------|--------------|--------------|
|           | Replicate                        | 2            | 577.819   | 10.525         | <b>0.001</b> |              |
|           | Regime × Replicate<br>experiment | 4            | 140.737   | 1.281          | 0.313        |              |
| <b>B.</b> | <b>Replicate experiment</b>      | <b>df</b>    | <b>SS</b> | <b>F ratio</b> | <b>P</b>     |              |
|           | 1                                | hatchability | 2         | 416.907        | 20.104       | <b>0.002</b> |
|           |                                  | pupae_3      | 2         | 0.003          | 0.586        | 0.585        |
|           |                                  | %viability   | 2         | 281.635        | 5.642        | <b>0.041</b> |
|           | 2                                | hatchability | 2         | 718.315        | 34.241       | <b>0.001</b> |
|           |                                  | pupae_3      | 2         | 0.0104         | 2.88         | 0.132        |
|           |                                  | %viability   | 2         | 623.794        | 9.836        | <b>0.012</b> |
|           | 3                                | hatchability | 2         | 589.072        | 12.79        | <b>0.006</b> |
|           |                                  | pupae_3      | 2         | 0.0119         | 1.201        | 0.364        |
|           |                                  | %viability   | 2         | 680.217        | 13.244       | <b>0.006</b> |

**Table S11.** Summary of 4-way ANOVA on mean post-infection survival of offspring as a function of replicate population, selection regime, parental priming status and sex

| Trait                    | SS     | df    | F-ratio | P                |
|--------------------------|--------|-------|---------|------------------|
| Replicate population (B) | 1.985  | 2     | 6.688   | <b>0.001</b>     |
| Selection regime (R)     | 88.118 | 3     | 197.903 | <b>&lt;0.001</b> |
| Sex (S)                  | 0.001  | 1     | 0.006   | 0.933            |
| Parental priming (P)     | 5.271  | 2     | 17.757  | <b>&lt;0.001</b> |
| B × R                    | 2.039  | 6     | 2.29    | <b>0.03</b>      |
| B × S                    | 0.206  | 2     | 0.695   | 0.499            |
| B × P                    | 0.08   | 4     | 0.135   | 0.969            |
| R × S                    | 0.101  | 3     | 0.226   | 0.877            |
| R × P                    | 10.571 | 6     | 11.871  | <b>&lt;0.001</b> |
| G × S                    | 0.364  | 2     | 1.228   | 0.293            |
| B × R × S                | 0.83   | 6     | 0.932   | 0.47             |
| B × R × P                | 2.133  | 12    | 1.197   | 0.281            |
| B × S × P                | 0.506  | 4     | 0.852   | 0.492            |
| R × S × P                | 0.547  | 6     | 0.614   | 0.718            |
| B × R × S × P            | 1.755  | 12    | 0.985   | 0.461            |
| Error                    | 586    | 86.97 |         |                  |

**Table S12.** Summary of 3-way ANOVA on mean post-infection survival of offspring as a function of selection regime, parental priming status and sex, from replicate populations that were handled together.

| Replicate population | Trait                | df | SS     | F-ratio | P                |
|----------------------|----------------------|----|--------|---------|------------------|
| 1                    | Selection regime (R) | 3  | 38.755 | 93.81   | <b>&lt;0.001</b> |
|                      | Sex (S)              | 1  | 0.103  | 0.754   | 0.386            |
|                      | Parental priming (P) | 2  | 2.035  | 7.389   | <b>0.001</b>     |
|                      | R × S                | 3  | 0.024  | 0.058   | 0.981            |
|                      | R × P                | 6  | 4.657  | 5.637   | <b>&lt;0.001</b> |

|   |           |     |        |        |                |
|---|-----------|-----|--------|--------|----------------|
|   | S × P     | 2   | 0.029  | 0.108  | 0.897          |
|   | R × S × P | 6   | 0.555  | 0.671  | 0.672          |
|   | Error     | 196 | 73.58  |        |                |
| 2 | R         | 3   | 26.168 | 54.598 | < <b>0.001</b> |
|   | S         | 1   | 0.004  | 0.025  | 0.873          |
|   | P         | 2   | 1.432  | 4.483  | <b>0.012</b>   |
|   | R × S     | 3   | 0.276  | 0.577  | 0.63           |
|   | R × P     | 6   | 5.217  | 5.442  | < <b>0.001</b> |
|   | S × P     | 2   | 0.793  | 2.482  | 0.086          |
|   | R × S × P | 6   | 0.567  | 0.591  | 0.736          |
|   | Error     | 193 | 30.83  |        |                |
| 4 | R         | 3   | 25.067 | 56.473 | < <b>0.001</b> |
|   | S         | 1   | 0.099  | 0.672  | 0.413          |
|   | P         | 2   | 1.861  | 6.29   | <b>0.002</b>   |
|   | R × S     | 3   | 0.632  | 1.424  | 0.236          |
|   | R × P     | 6   | 2.874  | 3.237  | <b>0.004</b>   |
|   | S × P     | 2   | 0.034  | 0.116  | 0.889          |
|   | R × S × P | 6   | 1.161  | 1.308  | 0.255          |
|   | Error     | 197 | 61.057 |        |                |

**Table S13.** Summary of Cox proportional hazard analysis on mean progeny survival from I regime

| Replicate population | Sex    | Hazard function | df | $\chi^2$ | P             |
|----------------------|--------|-----------------|----|----------|---------------|
| 1                    | Female | <b>7.943</b>    | 1  | 12.491   | <b>0.0004</b> |
|                      | Male   | <b>4.398</b>    | 1  | 8.443    | <b>0.003</b>  |
| 2                    | Female | <b>11.332</b>   | 1  | 14.116   | <b>0.0001</b> |
|                      | Male   | <b>3.589</b>    | 1  | 4.819    | <b>0.02</b>   |
| 4                    | Female | 2.337           | 1  | 2.655    | 0.103         |
|                      | Male   | 1.74            | 1  | 1.408    | 0.235         |

**Table S14.** Summary of Wilcoxon Rank Sum test on progeny fitness before infection, as a function of selection regimes and priming treatments

| Block | Trait     | $\chi^2$ | df | P     |
|-------|-----------|----------|----|-------|
| 1     | Regime    | 7.792    | 3  | 0.052 |
|       | Treatment | 2.147    | 1  | 0.143 |
| 2     | Regime    | 3.499    | 3  | 0.32  |
|       | Treatment | 0.418    | 1  | 0.517 |
| 4     | Regime    | 6.867    | 3  | 0.077 |
|       | Treatment | 0.029    | 1  | 0.864 |

**Table S15:** Summary of Wilcoxon Rank Sum test for change in offspring's reproductive output with infection across replicate populations and selection regimes. C- Control; P – Priming only; PI- Priming-Infection; I- Infection only.

| Replicate population | Treatment | Selection regime | $\chi^2$ | df | P               |
|----------------------|-----------|------------------|----------|----|-----------------|
| 1                    | Unprimed  | C                | 3.303    | 1  | 0.0691          |
|                      | primed    |                  | 7.828    | 1  | <b>0.005</b>    |
|                      | Unprimed  | P                | 0.157    | 1  | 0.691102        |
|                      | primed    |                  | 4.3246   | 1  | <b>0.037563</b> |
|                      | Unprimed  | PI               | 1.107    | 1  | 0.292           |
|                      | primed    |                  | 0.918    | 1  | 0.337           |
|                      | Unprimed  | I                | 10.115   | 1  | <b>0.001</b>    |
|                      | primed    |                  | 0.894    | 1  | 0.344           |
| 2                    | Unprimed  | C                | 3.481    | 1  | 0.062           |
|                      | primed    |                  | 3.951    | 1  | <b>0.046</b>    |
|                      | Unprimed  | P                | 0.903    | 1  | 0.341           |
|                      | primed    |                  | 4.698    | 1  | <b>0.03</b>     |
|                      | Unprimed  | PI               | 0.707    | 1  | 0.4             |
|                      | primed    |                  | 1.949    | 1  | 0.162           |
|                      | Unprimed  | I                | 5.080    | 1  | <b>0.024</b>    |
|                      | primed    |                  | 9.163    | 1  | <b>0.002</b>    |
| 4                    | Unprimed  | C                | 5.08     | 1  | <b>0.024</b>    |
|                      | primed    |                  | 6.33     | 1  | <b>0.011</b>    |
|                      | Unprimed  | P                | 2.668    | 1  | 0.102           |
|                      | primed    |                  | 5.512    | 1  | <b>0.018</b>    |
|                      | Unprimed  | PI               | 1.106    | 1  | 0.292           |
|                      | primed    |                  | 0.148    | 1  | 0.7             |
|                      | Unprimed  | I                | 9.29     | 1  | <b>0.002</b>    |
|                      | primed    |                  | 8.235    | 1  | <b>0.004</b>    |

**Table S16.** Summary of 3-way ANOVA on offspring fitness after infection

| Traits                     | df  | SS       | F Ratio | P                |
|----------------------------|-----|----------|---------|------------------|
| Block                      | 2   | 11.761   | 0.326   | 0.721            |
| Regime                     | 3   | 655.498  | 12.133  | <b>&lt;0.001</b> |
| Treatment                  | 1   | 59.057   | 3.279   | 0.071            |
| Block × Regime             | 6   | 36.509   | 0.337   | 0.916            |
| Block × Treatment          | 2   | 5.569    | 0.154   | 0.856            |
| Regime × Treatment         | 3   | 9.839    | 0.182   | 0.908            |
| Block × Regime × Treatment | 6   | 58.544   | 0.541   | 0.775            |
| Error                      | 194 | 3493.667 |         |                  |
